# Supplementary material for: Podocyte OTUD5 alleviates diabetic kidney disease through deubiquitinating TAK1 and reducing podocyte inflammation and injury
Source: PubMed Central journal article supplement (PMC11211476; doi:10.1038/s41467-024-49854-1), 2024-06-27
Supplement: 41467_2024_49854_MOESM1_ESM.pdf [file 41467_2024_49854_MOESM1_ESM.pdf]

## ***Supplementary Information***

### **Podocyte OTUD5 alleviates diabetic kidney disease through deubiquitinating TAK1 and reducing podocyte inflammation and injury**

The supplementary file includes 2 Table and 7 Figures.

**Supplementary Table 1.** Primer sequences for RT-qPCR assay.

| <b>Gene</b>                     | <b>Species</b> | <b>Sequence</b>                                   |
|---------------------------------|----------------|---------------------------------------------------|
| <i>Il6</i>                      | Mouse          | CTCCCAACAGACCTGTCTATAC<br>CCATTGCACAACCTCTTTTCTCA |
| <i>Tnfa</i>                     | Mouse          | ATGTCTCAGCCTCTTCTCATTC<br>GCTTGTCACTCGAATTTTGAGA  |
| <i>Otud5</i>                    | Mouse          | CTGCCTTTGGTCTGAATGATTG<br>GTCTAGGTATTCCTGTTGGGAC  |
| <i><math>\beta</math>-actin</i> | Mouse          | CTACCTCATGAAGATCCTGACC<br>CACAGCTTCTCTTTGATGTCAC  |

**Supplementary Table S2.** Clinical data from human subjects with or without DKD.

| Patient      | Age   | Sex | Scr<br>( $\mu\text{mol/L}$ ) | eGFR<br>( $\text{mL}/\text{min}/1.73\text{m}^2$ ) | UPE/24h<br>(g) | FBG<br>( $\text{mmol/L}$ ) |
|--------------|-------|-----|------------------------------|---------------------------------------------------|----------------|----------------------------|
| Normal group |       |     |                              |                                                   |                |                            |
| 1            | 55-60 | F   | 84                           | 114.7                                             | <0.15          | 6.2                        |
| 2            | 75-80 | M   | 61                           | 82.4                                              | <0.15          | 5.1                        |
| 3            | 70-75 | M   | 59                           | 97.9                                              | <0.15          | 4.8                        |
| DKD group    |       |     |                              |                                                   |                |                            |
| 1            | 75-80 | F   | 97                           | 48                                                | 3.6            | 12.1                       |
| 2            | 45-50 | F   | 135                          | 40.4                                              | 3.4            | 18.7                       |
| 3            | 60-65 | M   | 202                          | 29.2                                              | 6.4            | 13.2                       |

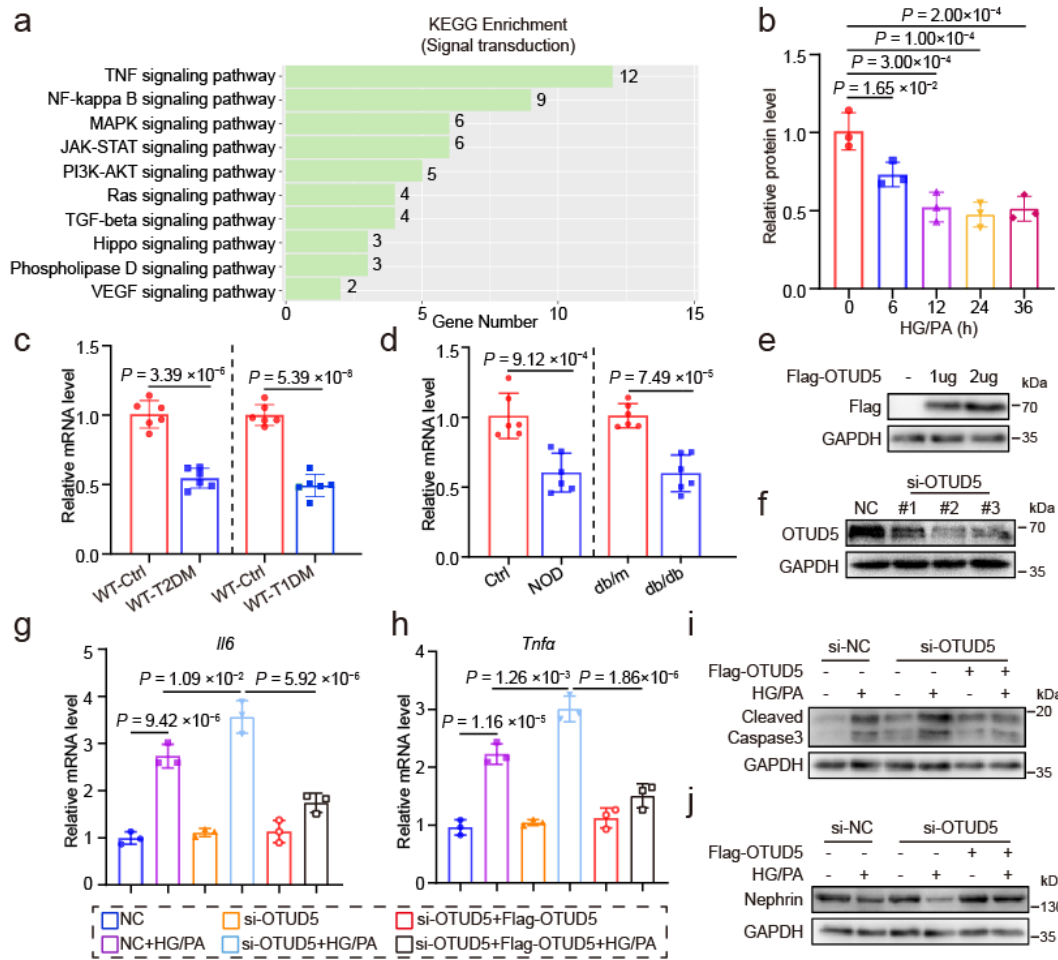

### Supplementary Figure 1: Identification of OTUD5 as a regulator of podocyte inflammation and injury.

(a) KEGG enrichments of differentially expressed genes. (b) Densitometric quantification of the immunoblot in Figure 1e. ( $n=3$  independent experiments;  $P$  values were determined by one-way ANOVA with Bonferroni's correction). (c) Relative mRNA levels of *Otud5* in renal cortex of T2DM mice and T1DM mice. ( $n=6$  samples;  $P$  values were determined by Two-tailed unpaired t test). (d) Relative mRNA levels of *Otud5* in renal cortex of NOD mice and db/db mice. ( $n=6$  samples;  $P$  values were determined by two-tailed unpaired t test). (e) Representative western blot of Flag expression in podocytes transfected with gradient Flag-OTUD5. ( $n=3$  independent experiments). (f) Representative western blot of OTUD5 expression in podocytes transfected with different si-OTUD5 sequences. ( $n=3$  independent experiments). (g-h) Real-time qPCR analysis of *Il6* (g) and *Tnfa* (h) in OTUD5 knockdown MPC5 transfected with Flag-OTUD5 plasmid followed by HG/PA for 8h. ( $n=3$  independent experiments;  $P$  values were determined by one-way ANOVA with Bonferroni's correction.). (i-j) Representative western blot of Cleaved Caspase3 (i) and Nephryn (j) expression in OTUD5 knockdown MPC5 transfected with Flag-OTUD5 plasmid followed by HG/PA. ( $n=3$  independent experiments). For b, c, d, g and h, data are presented as mean  $\pm$  SD.

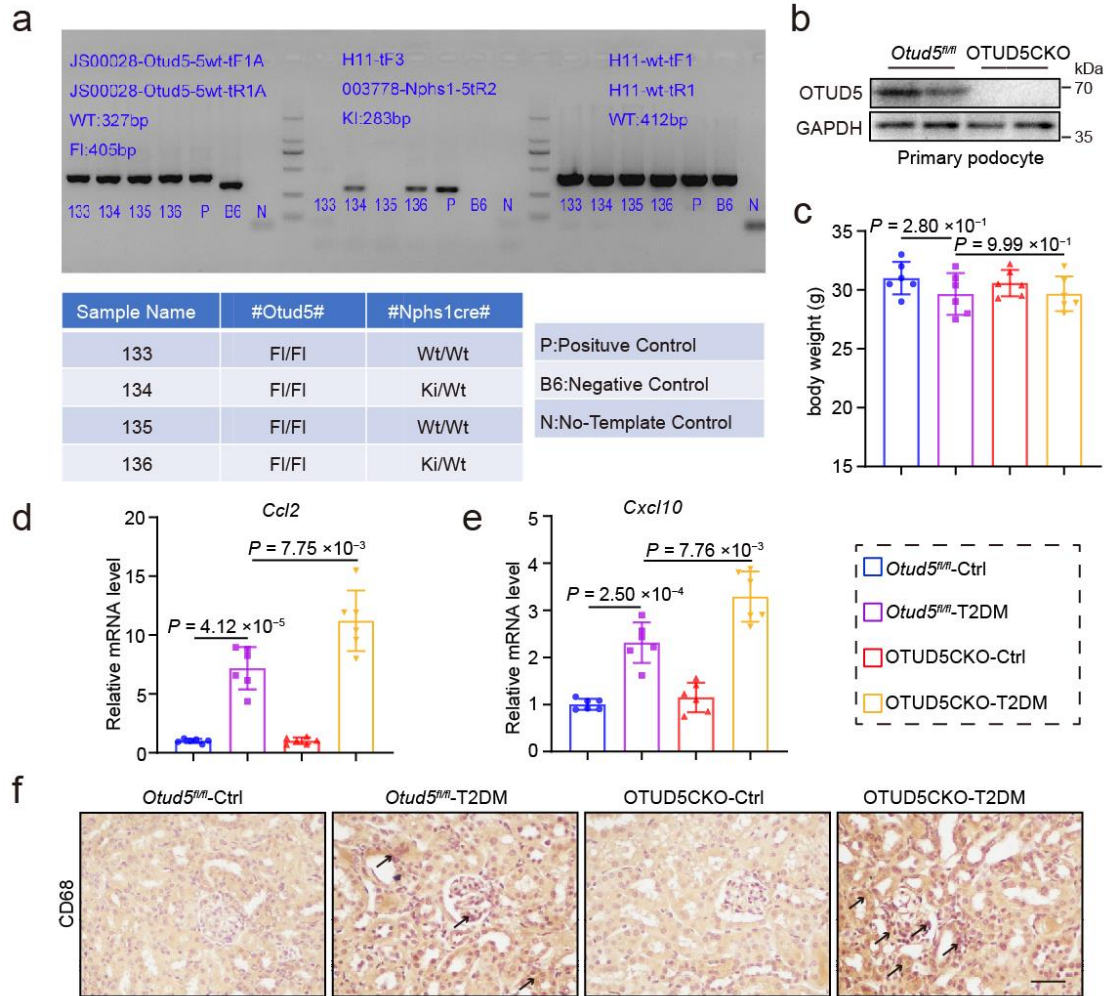

**Supplementary Figure 2: Podocyte-specific *Otud5* knockout aggravates macrophage infiltration in T2DM mouse kidney.**

(a) The primers of *Otud5* (WT:327bp, FI:405bp) and *Nphs-iCre* (KI:283bp) were respectively used for PCR to identify the genotype of mice. (b) Representative Western blot of OTUD5 expression in the kidney from *OTUD5<sup>fl/fl</sup>* and *OTUD5CKO* mice. ( $n = 6$  samples). (c) The levels of body weight in mice. ( $n = 6$  samples;  $P$  values were determined by one-way ANOVA with Bonferroni's correction). (d-e) Real-time qPCR showing mRNA levels of *Ccl2* (d) and *Cxcl10* (e) in kidney tissues of each group. ( $n = 6$  samples;  $P$  values were determined by one-way ANOVA with Bonferroni's correction. ns= no significance). (f) Representative immunohistochemistry (IHC) images of CD68 expression in mice. Scale bar, 50  $\mu$ m. ( $n = 6$  samples). For c-e, data are presented as mean  $\pm$  SD.

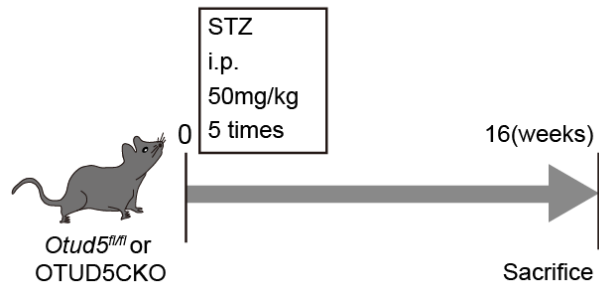

**Supplementary Figure 3: Schematic diagram depicting the procedure of STZ-induced T1DM mice.**

a

| Gene names    | Score         |
|---------------|---------------|
| Ighg2b, Igkc  | 323.31        |
| <b>OTUD5</b>  | <b>323.31</b> |
| Myh9          | 323.31        |
| Actb          | 313.54        |
| Rps18         | 267.27        |
| Myl12a;Myl12b | 187.21        |
| Rpl13         | 165.27        |
| Igkv4-55      | 158.01        |
| Ighg;Igh-1a   | 154.41        |
| <b>TAK1</b>   | <b>146.78</b> |
| Grn           | 144.6         |
| Myl6          | 132.87        |
| Rpl27         | 119.08        |
| Myh10         | 94.822        |
| Rps3          | 87.312        |

b

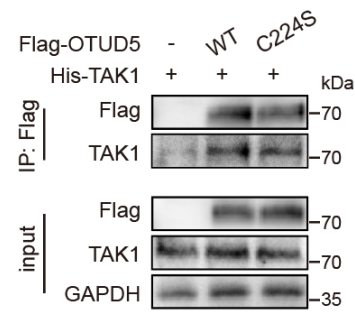

#### Supplementary Figure 4: Identification of TAK1 as a potential substrate protein of OTUD5.

(a) A table showing the candidate substrates of OTUD5 screened by the interactomes.  
 (b) Co-IP of OTUD5 in NIH/3T3 co-transfected with Flag-OTUD5 (WT or C24A) and His-TAK1 plasmids. Exogenous OTUD5 was immunoprecipitated using anti-Flag antibody. ( $n = 3$  independent experiments)

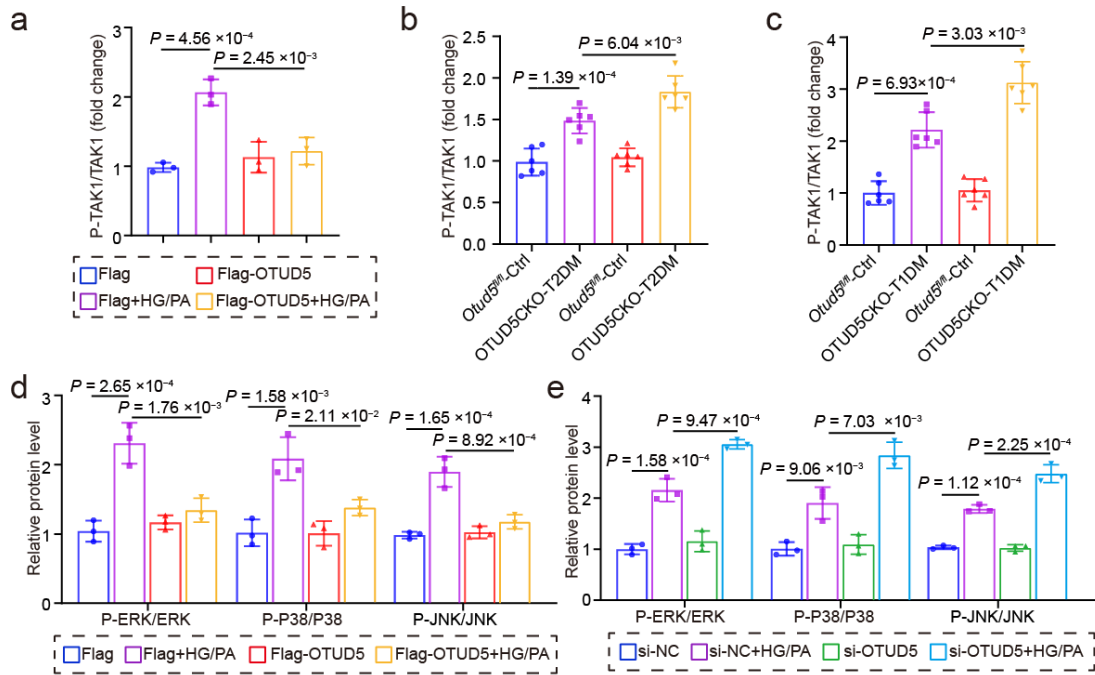

**Supplementary Figure 5: OTUD5 negatively regulates TAK1-MAPK pathway activation in podocytes.**

(a) Densitometric quantification of immunoblots in Figure 5a. ( $n=3$  independent experiments;  $P$  values were determined by one-way ANOVA with Bonferroni's correction). (b-c) Densitometric quantification of immunoblots in Figure 5c-d. ( $n=6$  samples;  $P$  values were determined by one-way ANOVA with Bonferroni's correction). (d-e) Densitometric quantification of immunoblots in Figure 5e-f. ( $n=3$  independent experiments;  $P$  values were determined by one-way ANOVA with Bonferroni's correction). For a-e, data are presented as mean  $\pm$  SD.

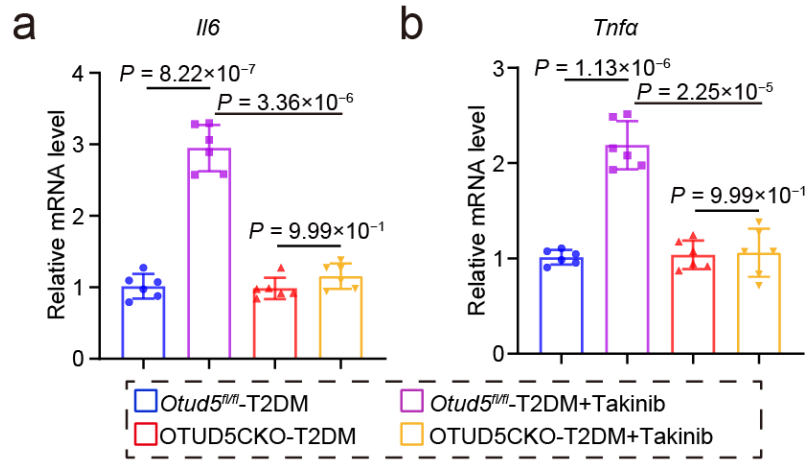

**Supplementary Figure 6: Inhibition of TAK1 eliminates the aggravated podocyte inflammatory cytokines in OTUD5CKO-T2DM mice.**

(a-b) Real-time qPCR showing mRNA levels of *Il6* (a) and *Tnfa* (b) in the kidney tissues of each group. ( $n = 6$  samples;  $P$  values were determined by one-way ANOVA with Bonferroni's correction and data are presented as mean  $\pm$  SD).



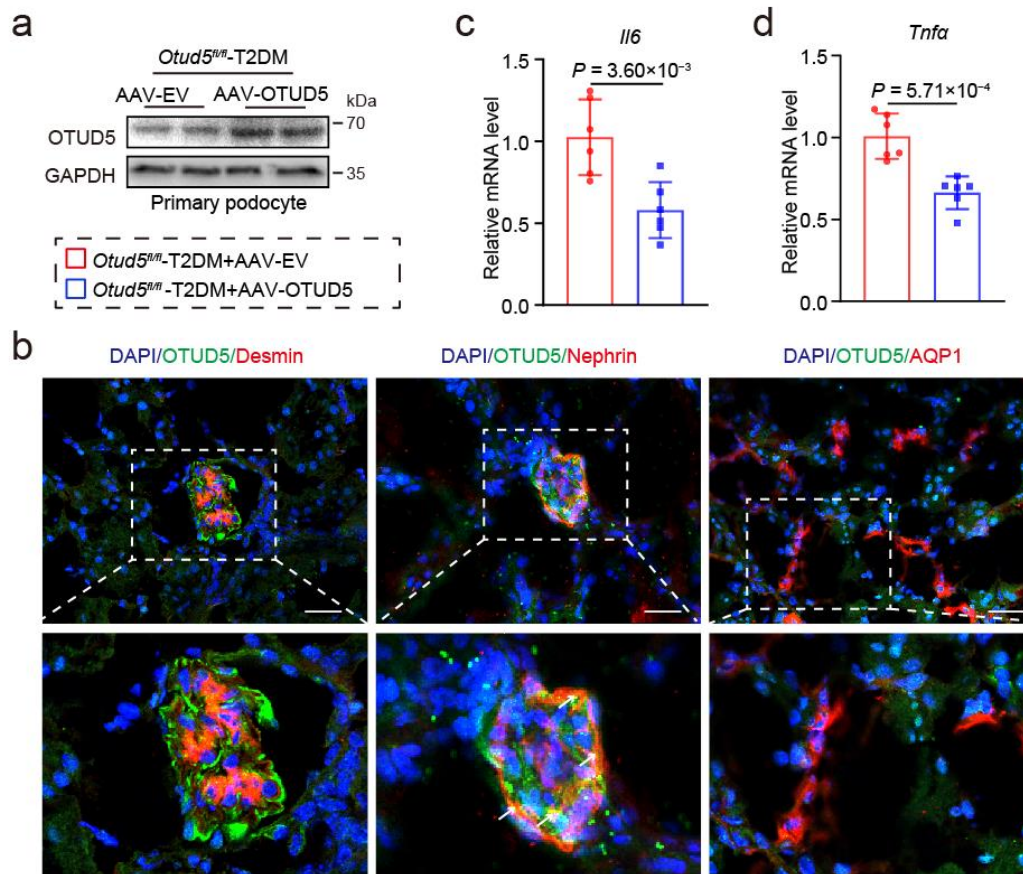

**Supplementary Figure 7: Podocyte-specific overexpression of OTUD5 alleviates podocyte inflammatory in T2DM mice.**

(a) Representative Western blot of OTUD5 expression in the kidney from *OTUD5<sup>fl/fl</sup>* +AAV-EV and *OTUD5<sup>fl/fl</sup>* +AAV-OTUD5 mice induced by T2DM. ( $n = 6$  samples). (b) Representative immunofluorescence staining images of kidney tissues from *OTUD5<sup>fl/fl</sup>* +AAV-OTUD5 mice, showing immunoreactivity to OTUD5 (green) and Desmin or Nephrin or AQP1 (red). Tissues were counterstained with DAPI (blue). Scale bar, 50 $\mu$ m. (c-d) Real-time qPCR showing mRNA levels of *Il6* (b) and *Tnfa* (c) in the kidney tissues of each group. ( $n = 6$  samples;  $P$  values were determined by two-tailed unpaired t test and data are presented as mean  $\pm$  SD)
